# Supplementary material for: Translating Clinical Findings into Knowledge in Drug Safety Evaluation - Drug Induced Liver Injury Prediction System (DILIps)
Source: PLoS Comput Biol. 2011 Dec 15;7(12):e1002310. doi: 10.1371/journal.pcbi.1002310 (PMC3240589; doi:10.1371/journal.pcbi.1002310)
Supplement: Table S1 — Information for the 473 side effects. Information included: (1) the number of drugs involved; (2) system organ classes (SOC) number and annotation of MedDRA; and (3) the distribution of 473 side effects in the SOC levels of MedDRA. (XLS) [file pcbi.1002310.s002.xls]

## Sheet: Mapping to SOC
SIDER Terms	Number of Drugs	SOC	SOC_annotation		Distribution of side effects in the SOC level of MedDRA
jaundice	274	10019805	Hepatobiliary disorders		Blood and lymphatic system disorders	Blood	18
hepatitis	254	10019805	Hepatobiliary disorders		Cardiac disorders	Cardiac	29
hepatic failure	132	10019805	Hepatobiliary disorders		Congenital, familial and genetic disorders	Congenital	2
liver function tests abnormal	111	10019805	Hepatobiliary disorders		Ear and labyrinth disorders	Ear	7
bilirubinemia	88	10019805	Hepatobiliary disorders		Endocrine disorders	Endocrine disorders	5
hepatomegaly	62	10019805	Hepatobiliary disorders		Eye disorders	Eye disorders	22
cholelithiasis	60	10019805	Hepatobiliary disorders		Gastrointestinal disorders	Gastrointestinal disorders	50
hepatic necrosis	56	10019805	Hepatobiliary disorders		General disorders and administration site conditions	General	19
cholecystitis	53	10019805	Hepatobiliary disorders		Hepatobiliary disorders	Hepatobiliary disorders	13
liver disease	42	10019805	Hepatobiliary disorders		Immune system disorders	Immune system disorders	4
elevated liver function tests	29	10019805	Hepatobiliary disorders		Infections and infestations	Infections and infestations	38
cirrhosis	27	10019805	Hepatobiliary disorders		Investigations	Investigations	9
liver fatty	22	10019805	Hepatobiliary disorders		Metabolism and nutrition disorders	Metabolism	24
thrombocytopenia	423	10005329	Blood and lymphatic system disorders		Musculoskeletal and connective tissue disorders	Musculoskeletal	26
leukopenia	377	10005329	Blood and lymphatic system disorders		Neoplasms benign, malignant and unspecified (incl cysts and polyps)	Neoplasms	6
anemia	345	10005329	Blood and lymphatic system disorders		Nervous system disorders	Nervous system disorders	47
agranulocytosis	233	10005329	Blood and lymphatic system disorders		Psychiatric disorders	Psychiatric disorders	17
neutropenia	210	10005329	Blood and lymphatic system disorders		Renal and urinary disorders	Renal and urinary disorders	22
eosinophilia	201	10005329	Blood and lymphatic system disorders		Reproductive system and breast disorders	Reproductive system and breast disorders	18
pancytopenia	158	10005329	Blood and lymphatic system disorders		Respiratory, thoracic and mediastinal disorders	Respiratory	34
hemolytic anemia	155	10005329	Blood and lymphatic system disorders		Skin and subcutaneous tissue disorders	Skin	41
lymphadenopathy	141	10005329	Blood and lymphatic system disorders		Vascular disorders	Vascular disorders	22
aplastic anemia	132	10005329	Blood and lymphatic system disorders
leukocytosis	99	10005329	Blood and lymphatic system disorders
Clotting	62	10005329	Blood and lymphatic system disorders
thrombocythemia	53	10005329	Blood and lymphatic system disorders
lymphopenia	36	10005329	Blood and lymphatic system disorders
transient ischemic attack	36	10005329	Blood and lymphatic system disorders
hypochromic anemia	33	10005329	Blood and lymphatic system disorders
lymphocytosis	27	10005329	Blood and lymphatic system disorders
blood dyscrasia	21	10005329	Blood and lymphatic system disorders
tachycardia	387	10007541	Cardiac disorders
palpitations	321	10007541	Cardiac disorders
arrhythmia	298	10007541	Cardiac disorders
bradycardia	239	10007541	Cardiac disorders
myocardial infarction	211	10007541	Cardiac disorders
angina pectoris	191	10007541	Cardiac disorders
cardiac arrest	155	10007541	Cardiac disorders
congestive heart failure	142	10007541	Cardiac disorders
heart failure	138	10007541	Cardiac disorders
atrial fibrillation	137	10007541	Cardiac disorders
heart disease	111	10007541	Cardiac disorders
ventricular tachycardia	89	10007541	Cardiac disorders
AV block	72	10007541	Cardiac disorders
myocardial ischemia	72	10007541	Cardiac disorders
ventricular extrasystoles	72	10007541	Cardiac disorders
ventricular fibrillation	67	10007541	Cardiac disorders
heart block	60	10007541	Cardiac disorders
supraventricular tachycardia	59	10007541	Cardiac disorders
bundle branch block	50	10007541	Cardiac disorders
cardiomyopathy	46	10007541	Cardiac disorders
coronary artery disease	42	10007541	Cardiac disorders
pericarditis	42	10007541	Cardiac disorders
sinus bradycardia	34	10007541	Cardiac disorders
cardiomegaly	30	10007541	Cardiac disorders
sinus tachycardia	29	10007541	Cardiac disorders
pericardial effusion	27	10007541	Cardiac disorders
supraventricular extrasystoles	27	10007541	Cardiac disorders
atrial flutter	25	10007541	Cardiac disorders
myocarditis	22	10007541	Cardiac disorders
porphyria	22	10010331	Congenital, familial and genetic disorders
malformations	21	10010331	Congenital, familial and genetic disorders
vertigo	355	10013993	Ear and labyrinth disorders
tinnitus	293	10013993	Ear and labyrinth disorders
ear pain	139	10013993	Ear and labyrinth disorders
hearing loss	92	10013993	Ear and labyrinth disorders
deafness	88	10013993	Ear and labyrinth disorders
hyperacusis	36	10013993	Ear and labyrinth disorders
Vestibular Disorders	29	10013993	Ear and labyrinth disorders
hypothyroidism	59	10014698	Endocrine disorders
SIADH	50	10014698	Endocrine disorders
goiter	39	10014698	Endocrine disorders
Endocrine Disorders	35	10014698	Endocrine disorders
hyperthyroidism	26	10014698	Endocrine disorders
blurred vision	288	10015919	Eye disorders
conjunctivitis	233	10015919	Eye disorders
abnormal vision	175	10015919	Eye disorders
diplopia	157	10015919	Eye disorders
spasm	130	10015919	Eye disorders
eye pain	130	10015919	Eye disorders
photophobia	120	10015919	Eye disorders
cataract	112	10015919	Eye disorders
dry eyes	107	10015919	Eye disorders
amblyopia	87	10015919	Eye disorders
glaucoma	77	10015919	Eye disorders
blindness	68	10015919	Eye disorders
blepharitis	57	10015919	Eye disorders
keratitis	53	10015919	Eye disorders
ptosis	42	10015919	Eye disorders
iritis	32	10015919	Eye disorders
retinopathy	29	10015919	Eye disorders
papilledema	27	10015919	Eye disorders
retinal hemorrhage	26	10015919	Eye disorders
uveitis	25	10015919	Eye disorders
lacrimation disorder	25	10015919	Eye disorders
watery eyes	24	10015919	Eye disorders
nausea	742	10017947	Gastrointestinal disorders
vomiting	690	10017947	Gastrointestinal disorders
diarrhea	615	10017947	Gastrointestinal disorders
abdominal pain	477	10017947	Gastrointestinal disorders
constipation	459	10017947	Gastrointestinal disorders
Dyspepsia	388	10017947	Gastrointestinal disorders
dry mouth	374	10017947	Gastrointestinal disorders
flatulence	286	10017947	Gastrointestinal disorders
pancreatitis	210	10017947	Gastrointestinal disorders
stomatitis	206	10017947	Gastrointestinal disorders
dysphagia	185	10017947	Gastrointestinal disorders
gastritis	181	10017947	Gastrointestinal disorders
gastrointestinal hemorrhage	147	10017947	Gastrointestinal disorders
melena	129	10017947	Gastrointestinal disorders
esophagitis	123	10017947	Gastrointestinal disorders
colitis	119	10017947	Gastrointestinal disorders
eructation	113	10017947	Gastrointestinal disorders
glossitis	111	10017947	Gastrointestinal disorders
increased salivation	106	10017947	Gastrointestinal disorders
rectal hemorrhage	97	10017947	Gastrointestinal disorders
mouth ulceration	88	10017947	Gastrointestinal disorders
abdominal distention	85	10017947	Gastrointestinal disorders
gingivitis	80	10017947	Gastrointestinal disorders
tooth disorder	73	10017947	Gastrointestinal disorders
hematemesis	70	10017947	Gastrointestinal disorders
peptic ulcer	67	10017947	Gastrointestinal disorders
heartburn	63	10017947	Gastrointestinal disorders
gastroesophageal reflux	63	10017947	Gastrointestinal disorders
ulcerative stomatitis	61	10017947	Gastrointestinal disorders
abdominal cramps	58	10017947	Gastrointestinal disorders
abdominal pain upper	58	10017947	Gastrointestinal disorders
hemorrhoids	56	10017947	Gastrointestinal disorders
gastric ulcer	51	10017947	Gastrointestinal disorders
fecal incontinence	50	10017947	Gastrointestinal disorders
Toothache	49	10017947	Gastrointestinal disorders
gum hemorrhage	42	10017947	Gastrointestinal disorders
duodenal ulcer	40	10017947	Gastrointestinal disorders
bloating	37	10017947	Gastrointestinal disorders
paralytic ileus	37	10017947	Gastrointestinal disorders
ascites	36	10017947	Gastrointestinal disorders
tenesmus	36	10017947	Gastrointestinal disorders
tooth caries	32	10017947	Gastrointestinal disorders
esophageal ulcer	30	10017947	Gastrointestinal disorders
halitosis	29	10017947	Gastrointestinal disorders
enterocolitis	29	10017947	Gastrointestinal disorders
acute pancreatitis	27	10017947	Gastrointestinal disorders
epigastric pain	26	10017947	Gastrointestinal disorders
ischemic colitis	24	10017947	Gastrointestinal disorders
enteritis	24	10017947	Gastrointestinal disorders
duodenitis	23	10017947	Gastrointestinal disorders
fever	503	10018065	General disorders and administration site conditions
edema	487	10018065	General disorders and administration site conditions
pain	461	10018065	General disorders and administration site conditions
fatigue	404	10018065	General disorders and administration site conditions
asthenia	369	10018065	General disorders and administration site conditions
chest pain	344	10018065	General disorders and administration site conditions
malaise	319	10018065	General disorders and administration site conditions
weakness	231	10018065	General disorders and administration site conditions
chills	231	10018065	General disorders and administration site conditions
peripheral edema	227	10018065	General disorders and administration site conditions
swelling	152	10018065	General disorders and administration site conditions
ulcer	122	10018065	General disorders and administration site conditions
abnormal gait	84	10018065	General disorders and administration site conditions
cyst	65	10018065	General disorders and administration site conditions
hernia	45	10018065	General disorders and administration site conditions
fibrosis	35	10018065	General disorders and administration site conditions
hypothermia	35	10018065	General disorders and administration site conditions
chest pain substernal	30	10018065	General disorders and administration site conditions
polyps	23	10018065	General disorders and administration site conditions
hypersensitivity	382	10021428	Immune system disorders
allergic reaction	315	10021428	Immune system disorders
anaphylaxis	289	10021428	Immune system disorders
serum sickness	47	10021428	Immune system disorders
infection	324	10021881	Infections and infestations
Pharyngitis	279	10021881	Infections and infestations
rhinitis	271	10021881	Infections and infestations
Influenza	253	10021881	Infections and infestations
Sinusitis	240	10021881	Infections and infestations
pneumonia	214	10021881	Infections and infestations
urinary tract infection	199	10021881	Infections and infestations
bronchitis	195	10021881	Infections and infestations
upper respiratory tract infection	188	10021881	Infections and infestations
gastroenteritis	137	10021881	Infections and infestations
vaginitis	122	10021881	Infections and infestations
cystitis	116	10021881	Infections and infestations
peripheral neuropathy	114	10021881	Infections and infestations
sepsis	105	10021881	Infections and infestations
herpes simplex	96	10021881	Infections and infestations
moniliasis	95	10021881	Infections and infestations
viral infection	93	10021881	Infections and infestations
cellulitis	77	10021881	Infections and infestations
laryngitis	77	10021881	Infections and infestations
otitis media	76	10021881	Infections and infestations
Nasopharyngitis	70	10021881	Infections and infestations
abscess	64	10021881	Infections and infestations
fungal infection	64	10021881	Infections and infestations
herpes zoster	64	10021881	Infections and infestations
oral moniliasis	62	10021881	Infections and infestations
vaginal moniliasis	50	10021881	Infections and infestations
folliculitis	48	10021881	Infections and infestations
pseudomembranous colitis	48	10021881	Infections and infestations
fungal dermatitis	40	10021881	Infections and infestations
furunculosis	37	10021881	Infections and infestations
bacterial infections	34	10021881	Infections and infestations
meningitis	34	10021881	Infections and infestations
pyelonephritis	32	10021881	Infections and infestations
periodontal abscess	29	10021881	Infections and infestations
otitis externa	27	10021881	Infections and infestations
ear infection	22	10021881	Infections and infestations
sialadenitis	22	10021881	Infections and infestations
diverticulitis	21	10021881	Infections and infestations
weight gain	209	10022891	Investigations
weight loss	184	10022891	Investigations
SGOT increased	84	10022891	Investigations
alkaline phosphatase increased	82	10022891	Investigations
constitutional symptoms	58	10022891	Investigations
ECG abnormal	53	10022891	Investigations
elevated liver enzymes	45	10022891	Investigations
laboratory test abnormal	36	10022891	Investigations
lactic dehydrogenase increased	32	10022891	Investigations
anorexia	431	10027433	Metabolism and nutrition disorders
hyperglycemia	219	10027433	Metabolism and nutrition disorders
dehydration	156	10027433	Metabolism and nutrition disorders
hypokalemia	146	10027433	Metabolism and nutrition disorders
hypoglycemia	137	10027433	Metabolism and nutrition disorders
hyponatremia	125	10027433	Metabolism and nutrition disorders
diabetes mellitus	115	10027433	Metabolism and nutrition disorders
gout	100	10027433	Metabolism and nutrition disorders
hypercholesterolemia	98	10027433	Metabolism and nutrition disorders
hyperuricemia	96	10027433	Metabolism and nutrition disorders
hyperkalemia	93	10027433	Metabolism and nutrition disorders
hypocalcemia	77	10027433	Metabolism and nutrition disorders
acidosis	67	10027433	Metabolism and nutrition disorders
hyperlipidemia	66	10027433	Metabolism and nutrition disorders
hypercalcemia	50	10027433	Metabolism and nutrition disorders
hypomagnesemia	46	10027433	Metabolism and nutrition disorders
hypernatremia	43	10027433	Metabolism and nutrition disorders
hypophosphatemia	43	10027433	Metabolism and nutrition disorders
hypertriglyceridemia	36	10027433	Metabolism and nutrition disorders
electrolyte imbalance	25	10027433	Metabolism and nutrition disorders
metabolic acidosis	25	10027433	Metabolism and nutrition disorders
cachexia	23	10027433	Metabolism and nutrition disorders
polydipsia	23	10027433	Metabolism and nutrition disorders
hyperphosphatemia	21	10027433	Metabolism and nutrition disorders
arthralgia	367	10028395	Musculoskeletal and connective tissue disorders
myalgia	353	10028395	Musculoskeletal and connective tissue disorders
back pain	313	10028395	Musculoskeletal and connective tissue disorders
muscle cramps	168	10028395	Musculoskeletal and connective tissue disorders
arthritis	158	10028395	Musculoskeletal and connective tissue disorders
leg cramps	119	10028395	Musculoskeletal and connective tissue disorders
arthrosis	108	10028395	Musculoskeletal and connective tissue disorders
bone pain	106	10028395	Musculoskeletal and connective tissue disorders
muscle weakness	105	10028395	Musculoskeletal and connective tissue disorders
neck pain	105	10028395	Musculoskeletal and connective tissue disorders
connective tissue disorders	84	10028395	Musculoskeletal and connective tissue disorders
Pain in limb	74	10028395	Musculoskeletal and connective tissue disorders
myopathy	71	10028395	Musculoskeletal and connective tissue disorders
rhabdomyolysis	69	10028395	Musculoskeletal and connective tissue disorders
musculoskeletal pain	55	10028395	Musculoskeletal and connective tissue disorders
neck rigidity	54	10028395	Musculoskeletal and connective tissue disorders
osteoporosis	53	10028395	Musculoskeletal and connective tissue disorders
bursitis	49	10028395	Musculoskeletal and connective tissue disorders
myositis	45	10028395	Musculoskeletal and connective tissue disorders
leg pain	41	10028395	Musculoskeletal and connective tissue disorders
tendinitis	34	10028395	Musculoskeletal and connective tissue disorders
pathological fracture	33	10028395	Musculoskeletal and connective tissue disorders
tenosynovitis	31	10028395	Musculoskeletal and connective tissue disorders
flank pain	28	10028395	Musculoskeletal and connective tissue disorders
torticollis	23	10028395	Musculoskeletal and connective tissue disorders
rheumatoid arthritis	22	10028395	Musculoskeletal and connective tissue disorders
cancer	59	10029104	Neoplasms benign, malignant and unspecified (incl cysts and polyps)
lymphoma	39	10029104	Neoplasms benign, malignant and unspecified (incl cysts and polyps)
carcinoma	39	10029104	Neoplasms benign, malignant and unspecified (incl cysts and polyps)
breast neoplasm	32	10029104	Neoplasms benign, malignant and unspecified (incl cysts and polyps)
leukemia	24	10029104	Neoplasms benign, malignant and unspecified (incl cysts and polyps)
breast cancer	21	10029104	Neoplasms benign, malignant and unspecified (incl cysts and polyps)
headache	694	10029205	Nervous system disorders
dizziness	616	10029205	Nervous system disorders
somnolence	469	10029205	Nervous system disorders
paresthesia	420	10029205	Nervous system disorders
syncope	348	10029205	Nervous system disorders
tremor	312	10029205	Nervous system disorders
seizures	251	10029205	Nervous system disorders
ataxia	188	10029205	Nervous system disorders
convulsions	185	10029205	Nervous system disorders
cerebrovascular accident	151	10029205	Nervous system disorders
migraine	150	10029205	Nervous system disorders
neuropathy	144	10029205	Nervous system disorders
amnesia	136	10029205	Nervous system disorders
coma	129	10029205	Nervous system disorders
tumor	99	10029205	Nervous system disorders
paralysis	93	10029205	Nervous system disorders
numbness	92	10029205	Nervous system disorders
lightheadedness	90	10029205	Nervous system disorders
nystagmus	76	10029205	Nervous system disorders
dysarthria	73	10029205	Nervous system disorders
visual field defect	73	10029205	Nervous system disorders
lupus	72	10029205	Nervous system disorders
neuralgia	70	10029205	Nervous system disorders
neuritis	65	10029205	Nervous system disorders
hyperesthesia	62	10029205	Nervous system disorders
dyskinesia	60	10029205	Nervous system disorders
encephalopathy	55	10029205	Nervous system disorders
aphasia	53	10029205	Nervous system disorders
burning sensation	49	10029205	Nervous system disorders
loss of consciousness	47	10029205	Nervous system disorders
grand mal	46	10029205	Nervous system disorders
cerebral ischemia	39	10029205	Nervous system disorders
optic neuritis	39	10029205	Nervous system disorders
mental depression	37	10029205	Nervous system disorders
cerebral hemorrhage	34	10029205	Nervous system disorders
cerebrovascular disorder	34	10029205	Nervous system disorders
Parkinson	34	10029205	Nervous system disorders
memory loss	32	10029205	Nervous system disorders
dementia	32	10029205	Nervous system disorders
hemiplegia	32	10029205	Nervous system disorders
tardive dyskinesia	32	10029205	Nervous system disorders
cerebral infarction	27	10029205	Nervous system disorders
pseudotumor cerebri	26	10029205	Nervous system disorders
dysesthesia	26	10029205	Nervous system disorders
intracranial hemorrhage	25	10029205	Nervous system disorders
concentration impaired	24	10029205	Nervous system disorders
facial paralysis	24	10029205	Nervous system disorders
insomnia	429	10037175	Psychiatric disorders
confusion	380	10037175	Psychiatric disorders
anxiety	351	10037175	Psychiatric disorders
nervousness	305	10037175	Psychiatric disorders
agitation	263	10037175	Psychiatric disorders
hallucinations	240	10037175	Psychiatric disorders
decreased libido	164	10037175	Psychiatric disorders
psychosis	126	10037175	Psychiatric disorders
nightmares	90	10037175	Psychiatric disorders
sleep disorder	83	10037175	Psychiatric disorders
delirium	80	10037175	Psychiatric disorders
personality disorder	41	10037175	Psychiatric disorders
suicide attempt	36	10037175	Psychiatric disorders
neurosis	35	10037175	Psychiatric disorders
abuse	31	10037175	Psychiatric disorders
paranoia	28	10037175	Psychiatric disorders
drug dependence	21	10037175	Psychiatric disorders
hematuria	234	10038359	Renal and urinary disorders
dysuria	196	10038359	Renal and urinary disorders
urinary frequency	188	10038359	Renal and urinary disorders
urinary retention	173	10038359	Renal and urinary disorders
renal failure	168	10038359	Renal and urinary disorders
urinary incontinence	140	10038359	Renal and urinary disorders
polyuria	122	10038359	Renal and urinary disorders
acute renal failure	119	10038359	Renal and urinary disorders
nocturia	102	10038359	Renal and urinary disorders
glycosuria	87	10038359	Renal and urinary disorders
albuminuria	79	10038359	Renal and urinary disorders
proteinuria	77	10038359	Renal and urinary disorders
interstitial nephritis	70	10038359	Renal and urinary disorders
kidney calculus	66	10038359	Renal and urinary disorders
renal insufficiency	66	10038359	Renal and urinary disorders
nephropathy	58	10038359	Renal and urinary disorders
urinary urgency	56	10038359	Renal and urinary disorders
kidney pain	51	10038359	Renal and urinary disorders
azotemia	32	10038359	Renal and urinary disorders
pyuria	30	10038359	Renal and urinary disorders
nephrotic syndrome	27	10038359	Renal and urinary disorders
urinary hesitancy	25	10038359	Renal and urinary disorders
impotence	202	10038604	Reproductive system and breast disorders
gynecomastia	125	10038604	Reproductive system and breast disorders
dysmenorrhea	102	10038604	Reproductive system and breast disorders
breast pain	85	10038604	Reproductive system and breast disorders
amenorrhea	79	10038604	Reproductive system and breast disorders
metrorrhagia	70	10038604	Reproductive system and breast disorders
vaginal hemorrhage	68	10038604	Reproductive system and breast disorders
breast disorders	65	10038604	Reproductive system and breast disorders
menstrual disorder	63	10038604	Reproductive system and breast disorders
menorrhagia	61	10038604	Reproductive system and breast disorders
pelvic pain	58	10038604	Reproductive system and breast disorders
breast enlargement	55	10038604	Reproductive system and breast disorders
galactorrhea	48	10038604	Reproductive system and breast disorders
priapism	43	10038604	Reproductive system and breast disorders
sexual dysfunction	32	10038604	Reproductive system and breast disorders
epididymitis	25	10038604	Reproductive system and breast disorders
uterine hemorrhage	25	10038604	Reproductive system and breast disorders
vaginal discharge	24	10038604	Reproductive system and breast disorders
dyspnea	433	10038738	Respiratory, thoracic and mediastinal disorders
cough	369	10038738	Respiratory, thoracic and mediastinal disorders
epistaxis	225	10038738	Respiratory, thoracic and mediastinal disorders
asthma	189	10038738	Respiratory, thoracic and mediastinal disorders
bronchospasm	167	10038738	Respiratory, thoracic and mediastinal disorders
nasal congestion	127	10038738	Respiratory, thoracic and mediastinal disorders
pulmonary edema	118	10038738	Respiratory, thoracic and mediastinal disorders
Mediastinal Disorders	111	10038738	Respiratory, thoracic and mediastinal disorders
hiccup	109	10038738	Respiratory, thoracic and mediastinal disorders
pulmonary embolism	98	10038738	Respiratory, thoracic and mediastinal disorders
apnea	95	10038738	Respiratory, thoracic and mediastinal disorders
wheezing	89	10038738	Respiratory, thoracic and mediastinal disorders
pleural effusion	77	10038738	Respiratory, thoracic and mediastinal disorders
sore throat	76	10038738	Respiratory, thoracic and mediastinal disorders
hemoptysis	75	10038738	Respiratory, thoracic and mediastinal disorders
hypoxia	73	10038738	Respiratory, thoracic and mediastinal disorders
rhinorrhea	64	10038738	Respiratory, thoracic and mediastinal disorders
lung disorder	55	10038738	Respiratory, thoracic and mediastinal disorders
shortness of breath	54	10038738	Respiratory, thoracic and mediastinal disorders
sneezing	51	10038738	Respiratory, thoracic and mediastinal disorders
respiratory failure	43	10038738	Respiratory, thoracic and mediastinal disorders
pulmonary fibrosis	42	10038738	Respiratory, thoracic and mediastinal disorders
interstitial pneumonitis	40	10038738	Respiratory, thoracic and mediastinal disorders
hoarseness	39	10038738	Respiratory, thoracic and mediastinal disorders
voice alteration	38	10038738	Respiratory, thoracic and mediastinal disorders
sinus congestion	37	10038738	Respiratory, thoracic and mediastinal disorders
respiratory arrest	36	10038738	Respiratory, thoracic and mediastinal disorders
dysphonia	34	10038738	Respiratory, thoracic and mediastinal disorders
hypoventilation	32	10038738	Respiratory, thoracic and mediastinal disorders
stridor	29	10038738	Respiratory, thoracic and mediastinal disorders
pneumothorax	28	10038738	Respiratory, thoracic and mediastinal disorders
atelectasis	27	10038738	Respiratory, thoracic and mediastinal disorders
pulmonary infiltration	21	10038738	Respiratory, thoracic and mediastinal disorders
pulmonary hypertension	21	10038738	Respiratory, thoracic and mediastinal disorders
rash	638	10040785	Skin and subcutaneous tissue disorders
pruritus	596	10040785	Skin and subcutaneous tissue disorders
urticaria	515	10040785	Skin and subcutaneous tissue disorders
alopecia	321	10040785	Skin and subcutaneous tissue disorders
angioedema	277	10040785	Skin and subcutaneous tissue disorders
erythema	264	10040785	Skin and subcutaneous tissue disorders
sweating	253	10040785	Skin and subcutaneous tissue disorders
photosensitivity	220	10040785	Skin and subcutaneous tissue disorders
Stevens - Johnson syndrome	204	10040785	Skin and subcutaneous tissue disorders
increased sweating	196	10040785	Skin and subcutaneous tissue disorders
purpura	196	10040785	Skin and subcutaneous tissue disorders
dermatitis	193	10040785	Skin and subcutaneous tissue disorders
erythema multiforme	182	10040785	Skin and subcutaneous tissue disorders
dry skin	157	10040785	Skin and subcutaneous tissue disorders
exfoliative dermatitis	155	10040785	Skin and subcutaneous tissue disorders
toxic epidermal necrolysis	152	10040785	Skin and subcutaneous tissue disorders
acne	149	10040785	Skin and subcutaneous tissue disorders
eczema	135	10040785	Skin and subcutaneous tissue disorders
ecchymosis	127	10040785	Skin and subcutaneous tissue disorders
contact dermatitis	106	10040785	Skin and subcutaneous tissue disorders
petechiae	84	10040785	Skin and subcutaneous tissue disorders
skin ulcer	75	10040785	Skin and subcutaneous tissue disorders
seborrhea	62	10040785	Skin and subcutaneous tissue disorders
hirsutism	55	10040785	Skin and subcutaneous tissue disorders
psoriasis	54	10040785	Skin and subcutaneous tissue disorders
nail disorder	47	10040785	Skin and subcutaneous tissue disorders
hyperpigmentation	43	10040785	Skin and subcutaneous tissue disorders
blistering	42	10040785	Skin and subcutaneous tissue disorders
hypopigmentation	34	10040785	Skin and subcutaneous tissue disorders
hyperhidrosis	33	10040785	Skin and subcutaneous tissue disorders
hypertrichosis	33	10040785	Skin and subcutaneous tissue disorders
erythema nodosum	31	10040785	Skin and subcutaneous tissue disorders
leukocytoclastic vasculitis	30	10040785	Skin and subcutaneous tissue disorders
skin irritation	30	10040785	Skin and subcutaneous tissue disorders
drug eruption	27	10040785	Skin and subcutaneous tissue disorders
striae	27	10040785	Skin and subcutaneous tissue disorders
atopic dermatitis	25	10040785	Skin and subcutaneous tissue disorders
skin atrophy	25	10040785	Skin and subcutaneous tissue disorders
night sweats	23	10040785	Skin and subcutaneous tissue disorders
miliaria	21	10040785	Skin and subcutaneous tissue disorders
skin nodule	21	10040785	Skin and subcutaneous tissue disorders
hypotension	399	10047065	Vascular disorders
hypertension	346	10047065	Vascular disorders
hemorrhage	299	10047065	Vascular disorders
flushing	281	10047065	Vascular disorders
postural hypotension	167	10047065	Vascular disorders
shock	156	10047065	Vascular disorders
Vascular Disorders	126	10047065	Vascular disorders
thrombophlebitis	125	10047065	Vascular disorders
phlebitis	116	10047065	Vascular disorders
vasculitis	116	10047065	Vascular disorders
hot flashes	71	10047065	Vascular disorders
elevated blood pressure	65	10047065	Vascular disorders
ischemia	64	10047065	Vascular disorders
hematoma	57	10047065	Vascular disorders
peripheral vascular disorder	48	10047065	Vascular disorders
deep vein thrombosis	41	10047065	Vascular disorders
deep thrombophlebitis	34	10047065	Vascular disorders
varicose vein	32	10047065	Vascular disorders
venous thrombosis	32	10047065	Vascular disorders
embolism	32	10047065	Vascular disorders
cold extremities	22	10047065	Vascular disorders
claudication	21	10047065	Vascular disorders
