# Supplementary material for: Translating Clinical Findings into Knowledge in Drug Safety Evaluation - Drug Induced Liver Injury Prediction System (DILIps)
Source: PLoS Comput Biol. 2011 Dec 15;7(12):e1002310. doi: 10.1371/journal.pcbi.1002310 (PMC3240589; doi:10.1371/journal.pcbi.1002310)
Supplement: Table S5 — The QSAR models performance for the 13 HepSEs and an additional two terms from the Investigation category, and for 14 HepSEs as suggested by an expert. (XLS) [file pcbi.1002310.s006.xls]

## Sheet: HepSE classes
The 13 HepSE classes in MedDRA with an additional two DILI related terms from the Investigation category
13 HepSE models	# of drugs with HepSEs	Accuracy	Sensitivity	Specificity
bilirubinemia	88	0.962	0.761	0.985
cholecystitis	53	0.978	0.83	0.988
cholelithiasis	60	0.976	0.75	0.992
cirrhosis	27	0.989	0.888	0.993
elevated liver function tests	29	0.988	0.758	0.996
hepatic failure	132	0.948	0.818	0.97
hepatic necrosis	56	0.97	0.91	0.974
hepatitis	254	0.931	0.909	0.94
hepatomegaly	62	0.956	0.709	0.974
jaundice	274	0.932	0.894	0.949
liver disease	42	0.979	0.738	0.991
liver fatty	22	0.989	0.818	0.994
liver function tests abnormal	111	0.951	0.828	0.969
alkaline phosphatase increased	82	0.952	0.951	0.952			Two DILI related terms from the investigation category
SGOT increased	84	0.962	0.88	0.971
14 DILI relevant terms as suggested by an expert
14 HepSE models	# of drugs with HepSEs	Accuracy	Sensitivity	Specificity
jaundice	274	0.932	0.894	0.949
hepatitis	254	0.931	0.909	0.94
hepatic failure	132	0.948	0.818	0.97
liver function tests abnormal	111	0.951	0.828	0.969
bilirubinemia	88	0.962	0.761	0.985
SGOT increased	84	0.962	0.88	0.971
alkaline phosphatase increased	82	0.952	0.951	0.952
hepatomegaly	62	0.956	0.709	0.974
cholelithiasis	60	0.976	0.75	0.992
hepatic necrosis	56	0.97	0.91	0.974
elevated liver enzymes	45	0.916	0.844	0.988
liver disease	42	0.979	0.738	0.991
elevated liver function tests	29	0.988	0.758	0.996
liver fatty	22	0.989	0.818	0.994
